# Supplementary material
Source: MDPI journal article supplement (https://www.mdpi.com/1424-2818/15/3/395)

### H3 Saturation Plot

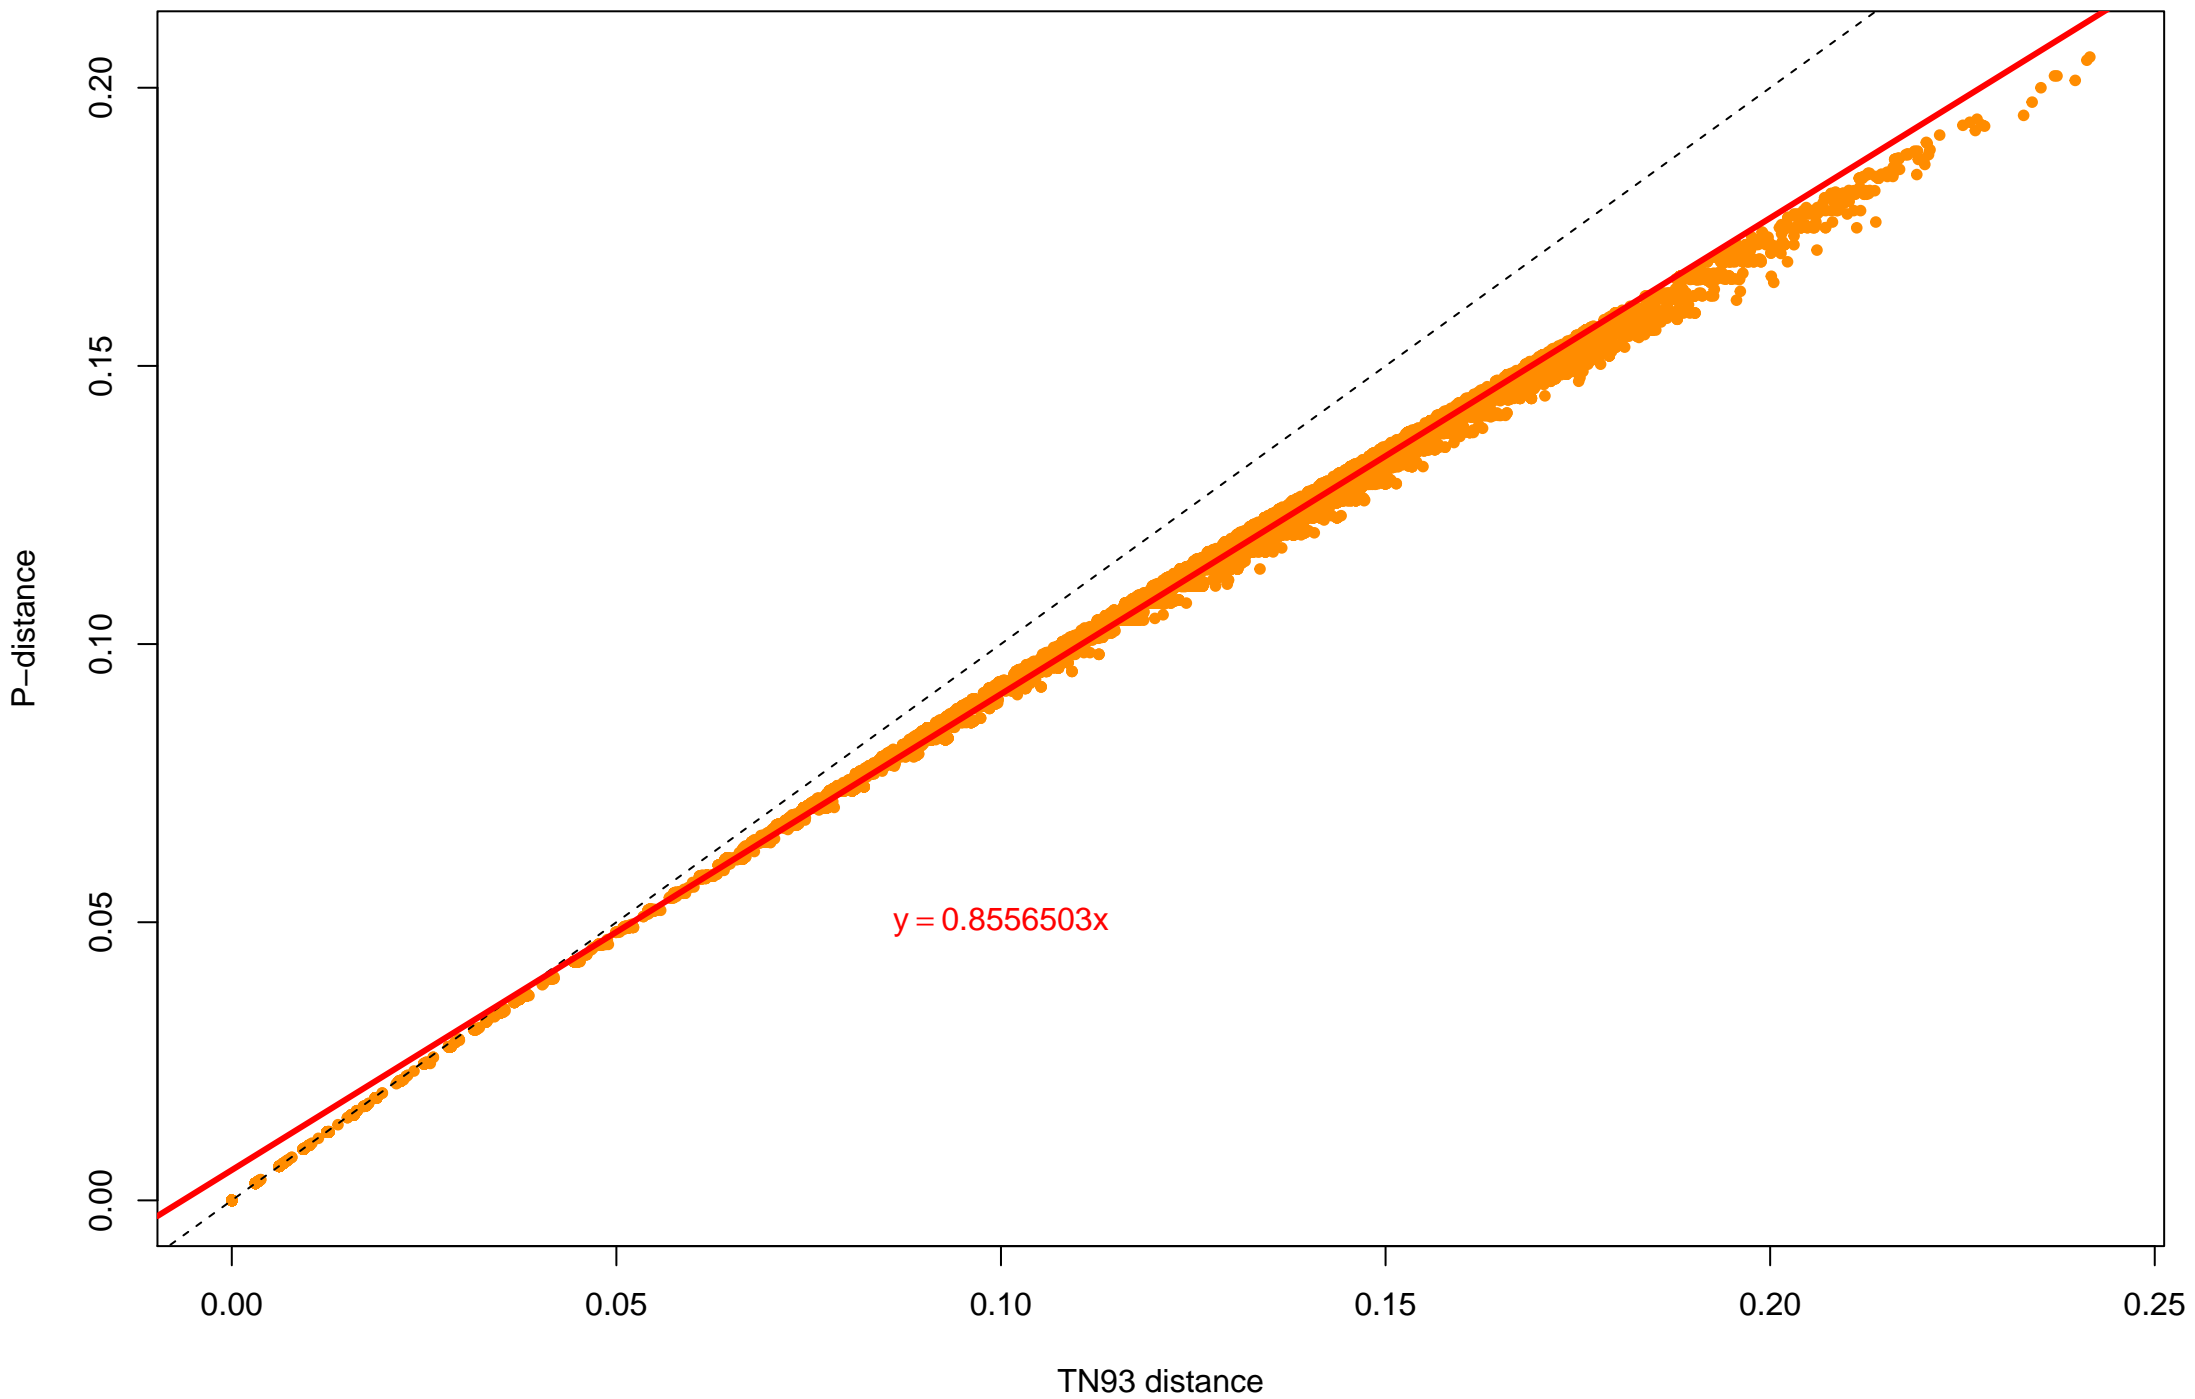

Supplement: s1 [file s1]

COI Saturation Plot

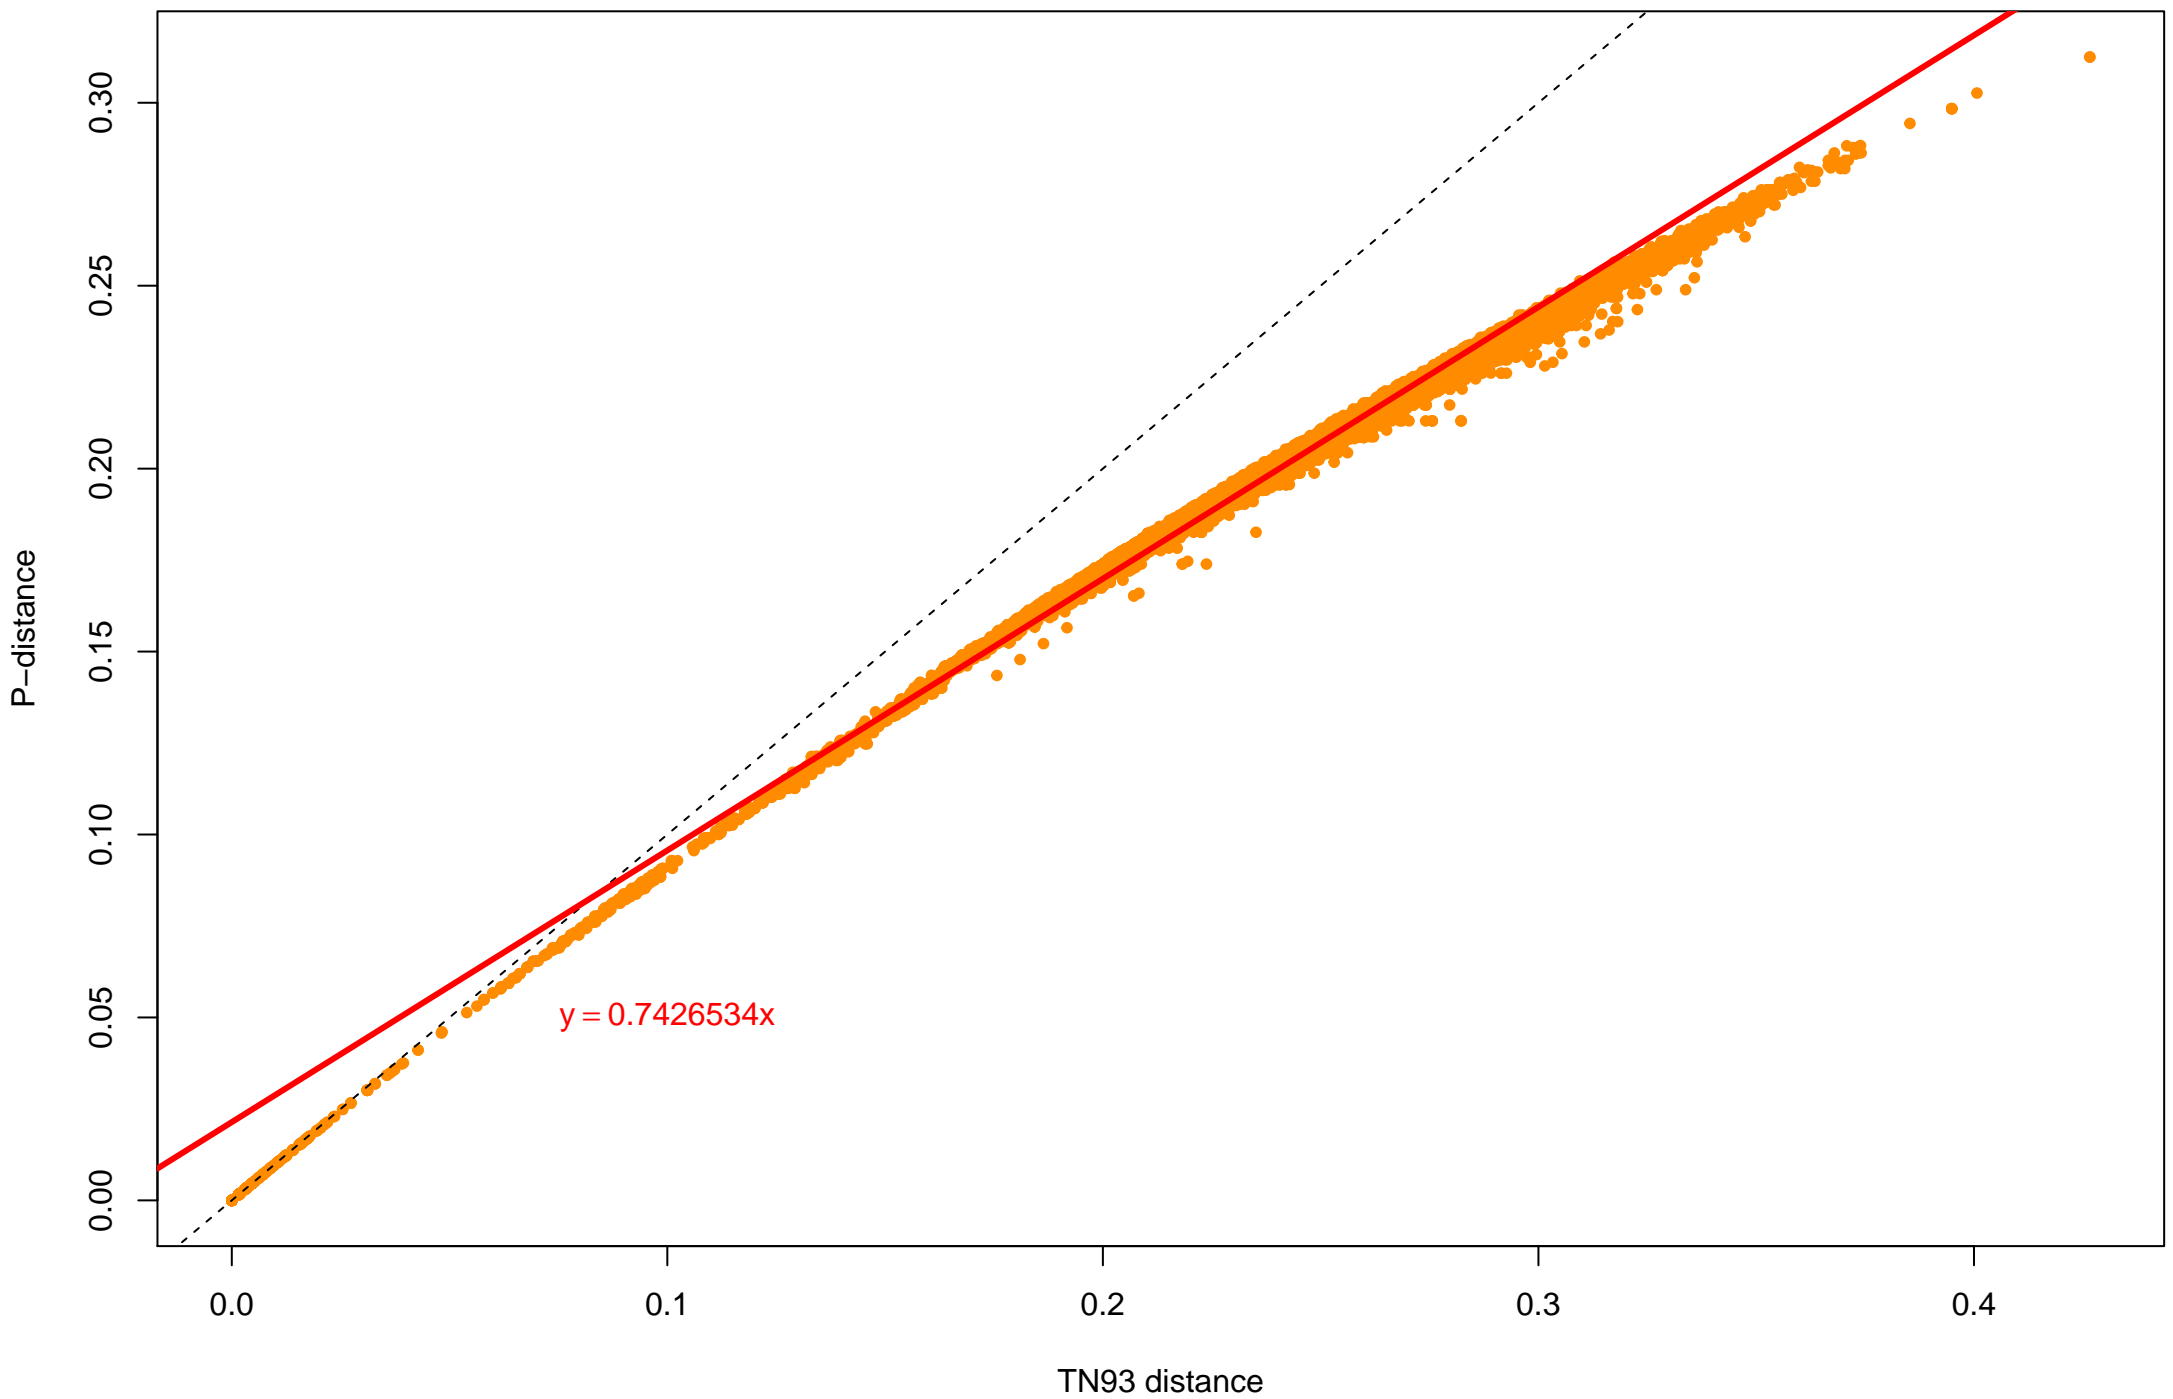

Supplement: s1 [file s1]
